# Supplementary material
Source: PubMed Central journal article supplement (PMC5897777)
Supplement: EMBJ-37-e98239-s001.pdf [file EMBJ-37-e98239-s001.pdf]

## Expanded View Figures

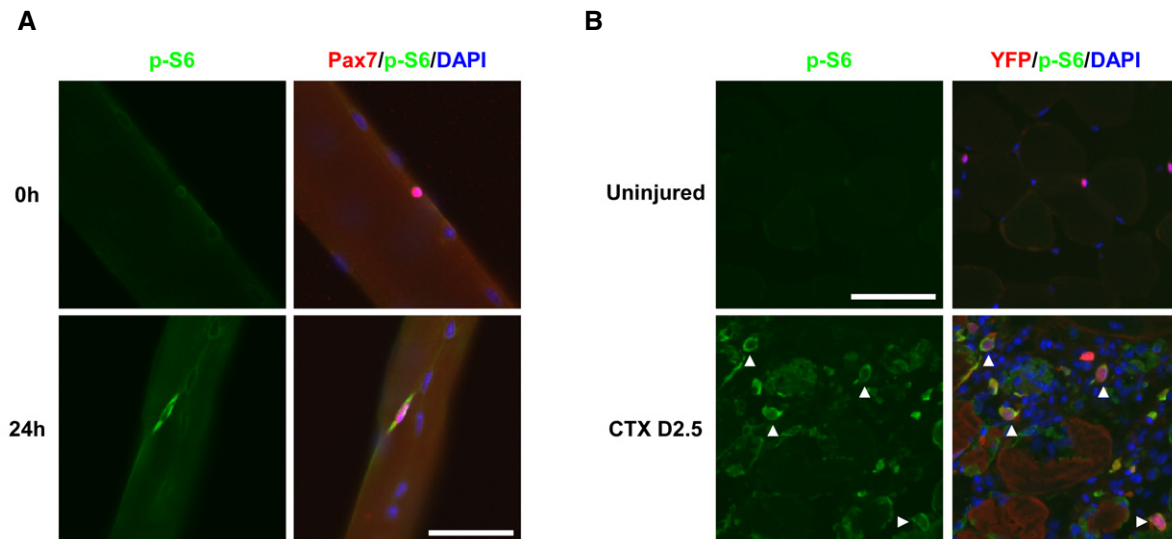

**Figure EV1. The PI3K pathway was active in ASC but not QSC.**

- A Freshly isolated single myofibers from 2-month-old wild-type mice were fixed either immediately or 24 h after culturing.
- B TA muscles from uninjured or cardiotoxin (CTX)-injured mice (2.5 days post-injury) were dissected, cryosectioned, and fixed. Myofibers from (A) and TA muscle sections from (B) were then subjected to immunostaining for p-S6 (green) together with Pax7 (A) and YFP (B) (red), respectively. The nuclei were counterstained with DAPI (blue). Arrowheads: YFP<sup>+</sup> MuSCs. Scale bars: 25  $\mu$ m.

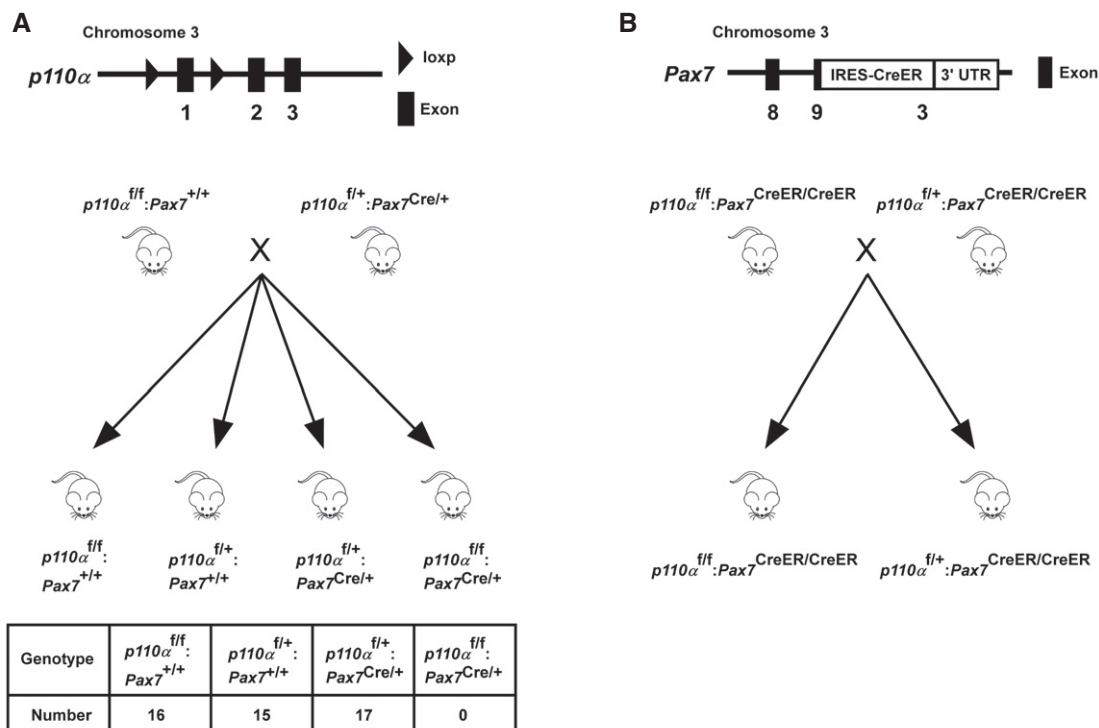

**Figure EV2. Generation of MuSC-specific  $p110\alpha$  knockout (KO) mice.**

A Non-inducible  $p110\alpha$  KO mice. Top: the schematic showing the floxed exon at the  $p110\alpha$  locus. Middle: the mating strategy to generate the non-inducible  $p110\alpha^{flf} : Pax7^{Cre/+}$  mice. Bottom: the number of offspring of different genotypes obtained based on the mating strategy above.  
 B Tamoxifen-inducible  $p110\alpha$  KO mice. Top: the schematic showing the location of CreER in  $Pax7^{CreER(GaKa)}$  mice. Bottom: the mating strategy to generate the tamoxifen-inducible  $p110\alpha^{flf} : Pax7^{CreER/CreER}$  mice.

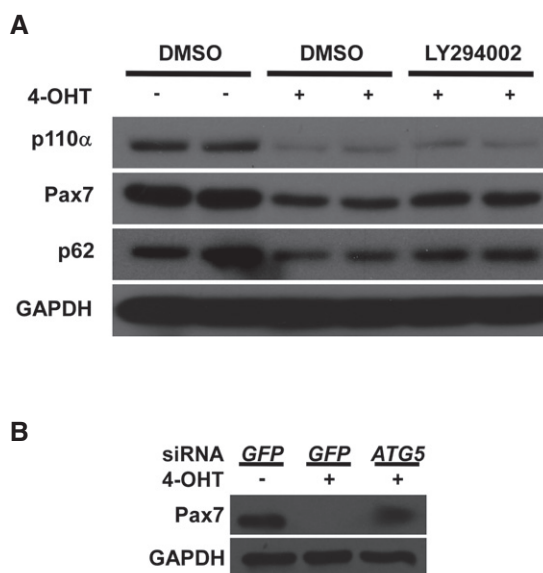

**Figure EV3. Reduction in Pax7 protein in  $p110\alpha$ -null MuSCs was mediated by autophagy.**

A, B FACS-isolated MuSCs from iKO mice (without Tmx) were cultured for 2 days followed by 1 day of 4-OHT treatment. Then, the cells were either treated with DMSO or LY294002 (10  $\mu$ M) in (A) or transfected with siRNAs in (B) as indicated and grown in the presence of 4-OHT for another day before harvest. Whole-cell lysates were subjected to Western blotting.

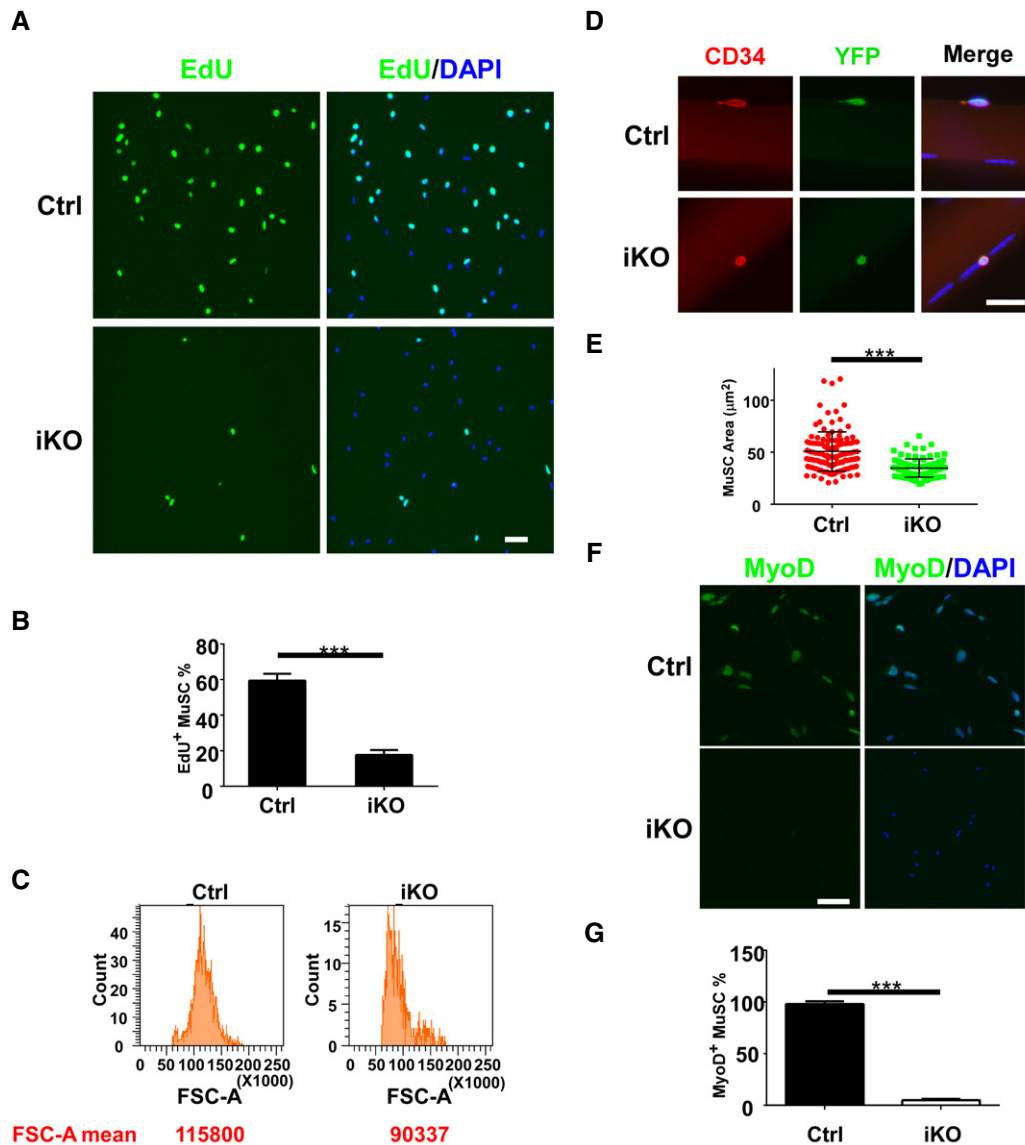

**Figure EV4. *p110* $\alpha$ -null MuSCs were arrested in the  $G_0$  state.**

- A FACS-isolated MuSCs from the tamoxifen (Tmx)-treated Ctrl and iKO mice were cultured for 36 h followed by a 4-h EdU pulse. Cells were fixed and stained for EdU (green) and DAPI (blue).
- B Quantification of the EdU<sup>+</sup> MuSCs from (A) by counting ~600 MuSCs from triplicate wells.
- C Histograms showing the mean FSC-A values of MuSCs freshly isolated from the Ctrl and iKO mice.
- D Freshly isolated single myofibers ( $n > 20$ ) from the Ctrl and iKO mice ( $n = 3$  in each group) were immediately fixed and stained for CD34 (red), YFP (green), and DAPI (blue). A representative image is shown.
- E Quantification of the areas of MuSCs from (D) based on CD34 staining. More than 100 MuSCs were calculated for each group of mice.
- F FACS-isolated MuSCs from the Tmx-treated Ctrl and iKO mice were cultured for 36 h followed by staining for MyoD (green) and DAPI (blue).
- G Quantification of the MyoD<sup>+</sup> ASCs from (F) by counting ~600 ASCs in triplicate wells. Scale bars: 25  $\mu\text{m}$ . In (B, E, G), the data are presented as mean  $\pm$  s.d. \*\*\* $p < 0.001$ .

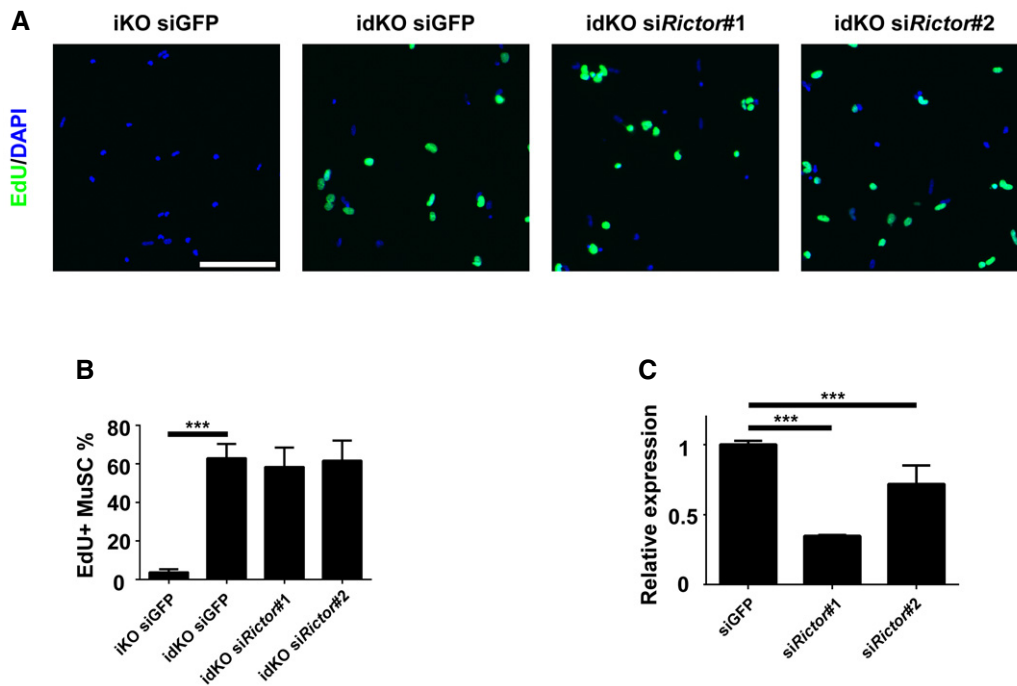

**Figure EV5. mTORC2 was not required for the cell cycle re-entry of MuSCs from idKO mice.**

A FACS-isolated MuSCs from iKO and idKO mice were transfected with siRNAs as indicated in the presence of EdU for 36 h followed by cell fixation and staining for EdU (green) and DAPI (blue).  
 B Quantification of the EdU<sup>+</sup> MuSCs in (A) by counting ~600 MuSCs in triplicate wells.  
 C Triplicate C2C12 cells were transfected with indicated siRNAs for 24 h. Total RNAs were extracted. The mRNA levels of *Rictor* were measured by RT-qPCR. Scale bar: 50  $\mu$ m. In (B, C), the data are presented as mean  $\pm$  s.d. \*\*\**P* < 0.001.

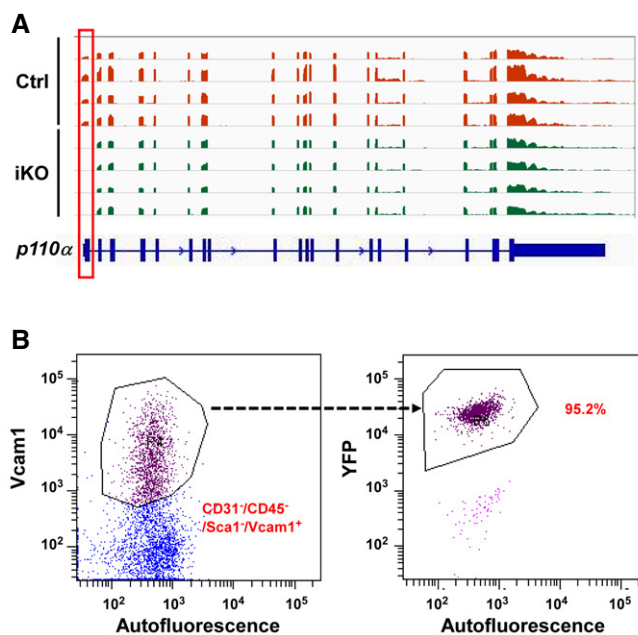

**Figure EV6. Examination of the Cre-mediated gene deletion efficiency.**

A The genome browser view showing the expression of *p110 $\alpha$*  exons in MuSCs from the Ctrl and iKO mice based on our RNA-seq data. Note the absence of the transcripts from the 1<sup>st</sup> exon in MuSCs from four mutant iKO mice.  
 B The representative FACS plots showing the percentage of YFP<sup>+</sup> MuSCs among the CD31<sup>-</sup>/CD45<sup>-</sup>/Sca1<sup>-</sup>/Vcam1<sup>+</sup> cell population, which indirectly revealed the Cre-mediated gene deletion efficiency at the *p110 $\alpha$*  locus.

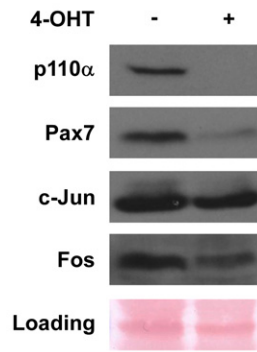

**Figure EV7. Fos protein levels were reduced in cultured *p110 $\alpha$* -null primary myoblasts.**

FACS-isolated MuSCs from iKO mice (without Tmx) were cultured for 2 days followed by 2 days of 4-OHT treatment before harvest. Whole-cell lysates were subjected to Western blotting.

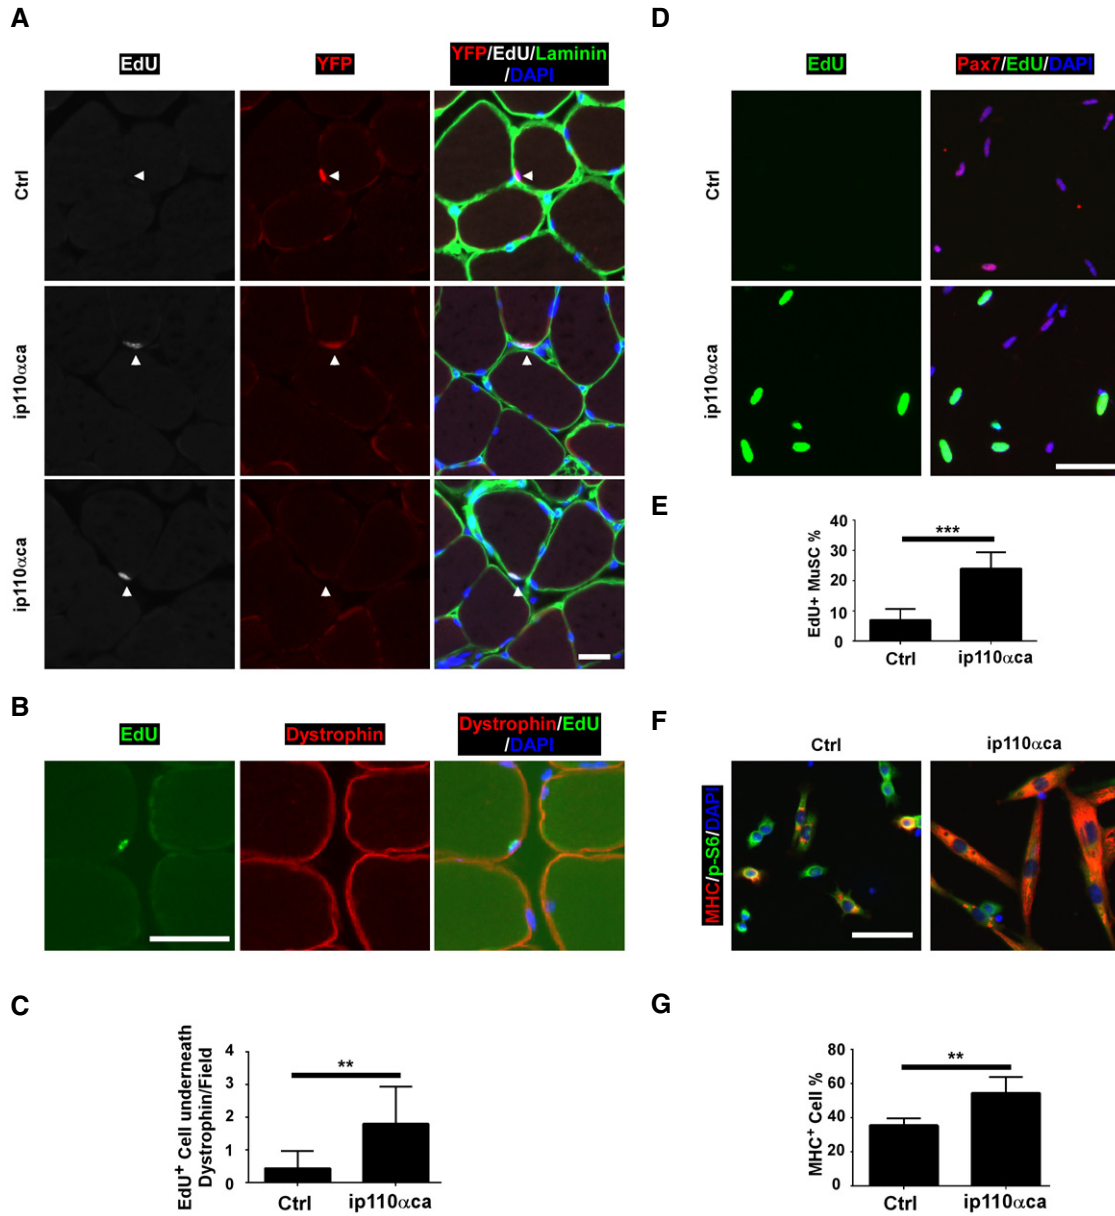

**Figure EV8. MuSCs from ip110 $\alpha$ ca mice proliferated and differentiated faster.**

- A TA muscle sections from the Ctrl and ip110 $\alpha$ ca mice as described in Fig 7A were stained for EdU (white), YFP (red), laminin (green), and DAPI (blue). Arrowheads: YFP<sup>+</sup>/EdU<sup>-</sup>, YFP<sup>-</sup>/EdU<sup>+</sup>, or YFP<sup>+</sup>/EdU<sup>+</sup> cells.
- B TA muscle sections as described above were stained for EdU (green) and dystrophin (red).
- C Quantification of the EdU<sup>+</sup> cells underneath the dystrophin<sup>+</sup> sarcolemma in (B). Three pairs of mice were examined including five TA muscle sections per mouse and three microscopic fields per section.
- D FACS-isolated MuSCs from the Ctrl or ip110 $\alpha$ ca mice were cultured for 24 h followed by a 4-h EdU pulse.
- E Quantification of the EdU<sup>+</sup> ASCs in (D) by counting ~600 ASCs in triplicate wells.
- F FACS-isolated MuSCs from the Ctrl or ip110 $\alpha$ ca mice were cultured for 3 days followed by cell fixation and staining for MHC (red), p-S6 (green), and DAPI (blue).
- G Quantification of the MHC<sup>+</sup> cells in (F) by counting ~600 nuclei in triplicate wells. Scale bars: 25  $\mu$ m. In (C, E, G), the data are presented as mean  $\pm$  s.d. \*\* $P$  < 0.01; \*\*\* $P$  < 0.001.
